# Supplementary material for: Linking Proteomic and Transcriptional Data through the Interactome and Epigenome Reveals a Map of Oncogene-induced Signaling
Source: PubMed Central journal article supplement (PMC3567149; doi:10.1371/journal.pcbi.1002887), 2013-02-07

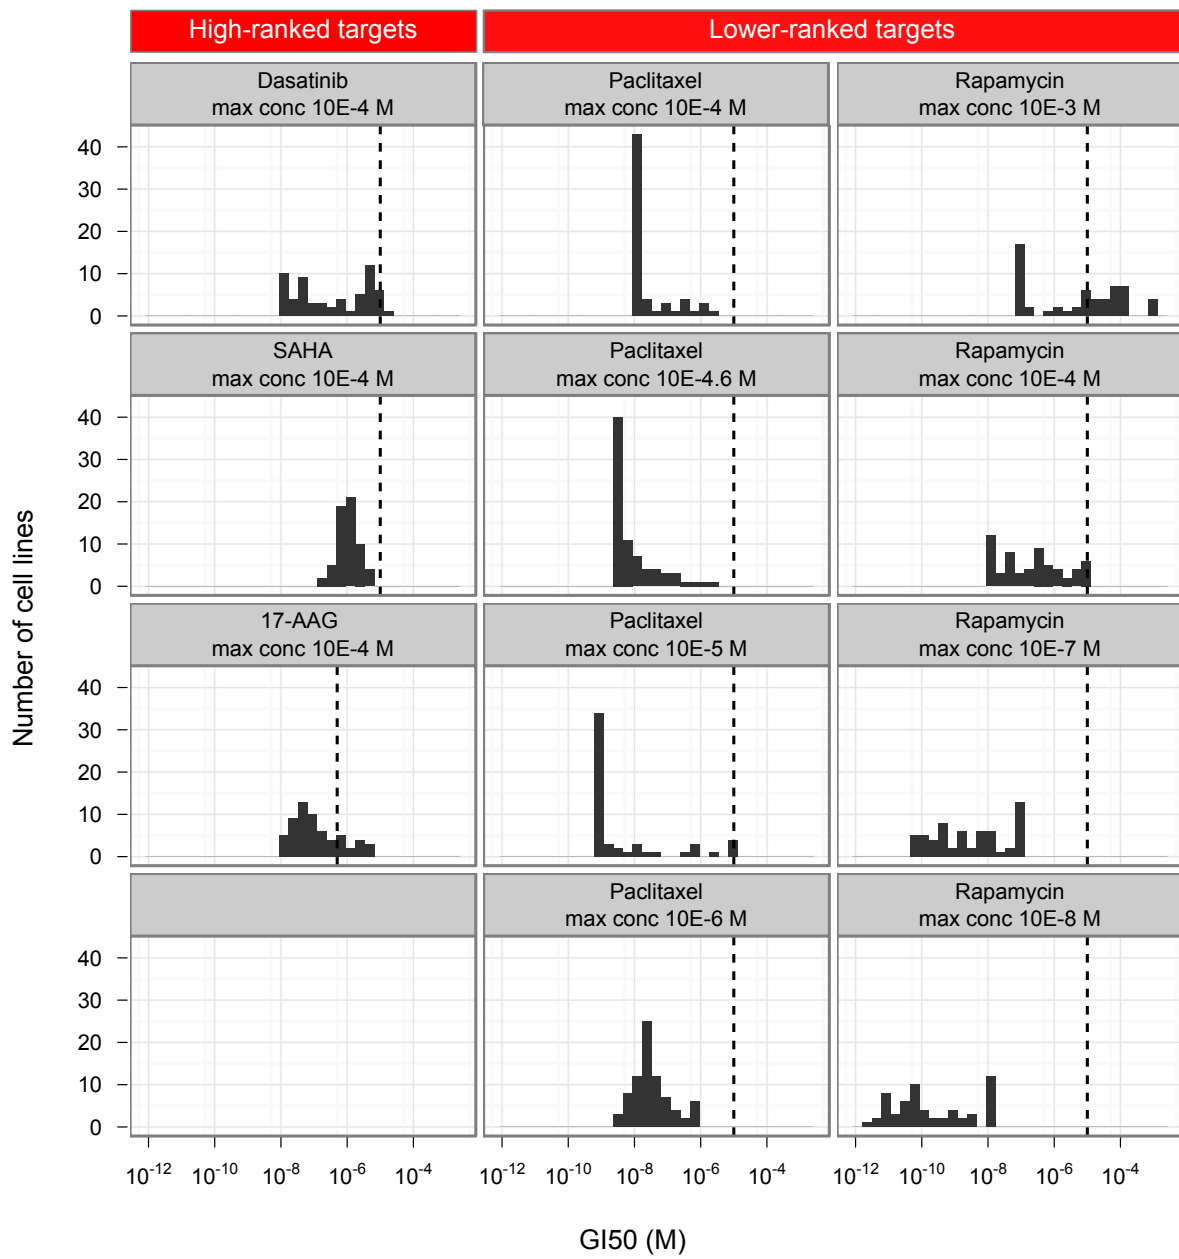

Supplement: pcbi.1002887.s003.pdf [file pcbi.1002887.s003.pdf]
